# Supplementary material
Source: PubMed Central journal article supplement (PMC4139728)
Supplement: ismej201437x2.pdf [file ismej201437x2.pdf]

Supplementary Table 2.: PlutoF identification of fungal OTUs in soil and their mean relative abundances before and after the bark beetle-induced tree dieback. All OTUs with abundance >0.5% in at least three samples were included. Data represent means of three samples, italic indexes represent significant differences at  $P < 0.05$  (ANOVA + Fisher LSD post-hoc test). Abbreviations: A – *Ascomycota*, B – *Basidiomycota*, G – *Glomeromycota*, M – *Mortierellomycotina*.

| OTU | Order (Phylum)               | Best identified hit (Accession number)        | Similarity |         | Relative abundance (%) |                    |                    |                   |                     |                    |
|-----|------------------------------|-----------------------------------------------|------------|---------|------------------------|--------------------|--------------------|-------------------|---------------------|--------------------|
|     |                              |                                               | (%)        | E-value | Mean                   | 2008               | 2009               | 2010              | 2011                | 2012               |
| 23  | <i>Filobasidiales</i> (B)    | <i>Cryptococcus terricola</i> (FN298663)      | 100        | 0.0     | 147.5                  | 64.1 <sup>a</sup>  | 33.1 <sup>a</sup>  | 70.7 <sup>a</sup> | 191.7 <sup>ab</sup> | 387.2 <sup>b</sup> |
| 25  | <i>Saccharomycetales</i> (A) | <i>Nadsonia fulvescens</i> (AB056137)         | 98         | 0.0     | 54.5                   | 8.3                | 4.3                | 98.9              | 103.5               | 89.2               |
| 69  | <i>Mortierellales</i> (M)    | <i>Mortierella turficola</i> (HQ630350)       | 96         | e-173   | 49.0                   | 3.4 <sup>a</sup>   | 222.6 <sup>b</sup> | 2.5 <sup>a</sup>  | 16.0 <sup>ab</sup>  | 0.9 <sup>a</sup>   |
| 101 | <i>Pezizales</i> (A)         | <i>Pseudaleuria quinaultiana</i> (EU669387)   | 89         | e-133   | 47.4                   | 59.4               | 1.9                | 116.9             | 68.9                | 27.7               |
| 13  | <i>Helotiales</i> (A)        | <i>Acephala applanata</i> (AY078145)          | 100        | 0.0     | 41.6                   | 3.5                | 41.8               | 17.0              | 48.6                | 35.4               |
| 3   | <i>Russulales</i> (B)        | <i>Russula ochroleuca</i> (HM189876)          | 99         | 0.0     | 39.8                   | 55.9 <sup>b</sup>  | 98.3 <sup>b</sup>  | 0.0 <sup>a</sup>  | 43.9 <sup>ab</sup>  | 0.9 <sup>a</sup>   |
| 9   | <i>Helotiales</i> (A)        | <i>Cadophora finlandica</i> (EF093179)        | 94         | e-122   | 36.0                   | 13.8               | 30.1               | 10.1              | 36.9                | 71.2               |
| 32  | <i>Helotiales</i> (A)        | <i>Leptodontidium elatius</i> (JF340290)      | 94         | e-170   | 32.8                   | 0.8                | 0.0                | 218.9             | 1.9                 | 5.7                |
| 17  | <i>Mortierellales</i> (M)    | <i>Mortierella verticillata</i> (JN943796)    | 100        | 0.0     | 27.9                   | 87.4               | 32.6               | 0.0               | 12.2                | 4.4                |
| 80  | <i>Agaricales</i> (B)        | <i>Resupinatus applicatus</i> (UDB011386)     | 98         | 2e-82   | 27.0                   | 17.3               | 0.7                | 99.4              | 17.8                | 32.8               |
| 10  | <i>Mortierellales</i> (M)    | <i>Mortierella globulifera</i> (HQ847056)     | 97         | 1e-97   | 26.6                   | 3.7 <sup>a</sup>   | 46.7 <sup>bc</sup> | 4.9 <sup>a</sup>  | 52.0 <sup>c</sup>   | 13.8 <sup>ab</sup> |
| 30  | <i>Eurotiales</i> (A)        | <i>Penicillium inflatum</i> (AJ608959)        | 99         | 0.0     | 25.1                   | 0.5                | 42.9               | 22.6              | 64.1                | 3.0                |
| 12  | <i>Atheliales</i> (B)        | <i>Tylospora fibrillosa</i> (AF052562)        | 99         | 0.0     | 23.4                   | 117.0 <sup>b</sup> | 0.0 <sup>a</sup>   | 0.0 <sup>a</sup>  | 0.0 <sup>a</sup>    | 0.0 <sup>a</sup>   |
| 21  | <i>Helotiales</i> (A)        | <i>Cadophora finlandica</i> (EF093179)        | 92         | e-111   | 22.5                   | 2.6                | 12.7               | 11.1              | 1.9                 | 31.1               |
| 49  | <i>Dothideomycetes</i> (A)   | <i>Cenococcum geophilum</i> (AM087244)        | 99         | 0.0     | 20.9                   | 22.3               | 45.1               | 51.7              | 0.0                 | 1.8                |
| 16  | <i>Eurotiales</i> (A)        | <i>Penicillium spinulosum</i> (JN246018)      | 100        | 0.0     | 18.6                   | 3.3                | 28.9               | 3.6               | 50.4                | 7.9                |
| 53  | <i>Pezizales</i> (A)         | <i>Pseudaleuria quinaultiana</i> (EU669387)   | 99         | 0.0     | 17.3                   | 7.0                | 3.8                | 14.4              | 49.5                | 15.3               |
| 333 | <i>Mortierellales</i> (M)    | <i>Mortierella gemmifera</i> (HQ630293)       | 93         | e-123   | 16.3                   | 3.4 <sup>a</sup>   | 15.5 <sup>ab</sup> | 0.0 <sup>a</sup>  | 16.0 <sup>ab</sup>  | 38.9 <sup>b</sup>  |
| 6   | <i>Helotiales</i> (A)        | <i>Leptodontidium elatius</i> (FJ903294)      | 95         | e-180   | 16.0                   | 1.5                | 6.0                | 47.4              | 16.0                | 23.5               |
| 81  | <i>Mortierellales</i> (M)    | <i>Mortierella macrocystis</i> (AJ878782)     | 99         | 0.0     | 16.0                   | 5.8                | 9.4                | 2.8               | 18.0                | 30.4               |
| 113 | <i>Mortierellales</i> (M)    | <i>Mortierella turficola</i> (HQ630350)       | 96         | e-173   | 15.6                   | 1.6 <sup>a</sup>   | 54.0 <sup>b</sup>  | 0.0 <sup>a</sup>  | 1.9 <sup>a</sup>    | 5.3 <sup>a</sup>   |
| 104 | <i>Atheliales</i> (B)        | <i>Tylospora fibrillosa</i> (JN943896)        | 99         | 0.0     | 14.7                   | 44.2               | 24.1               | 0.0               | 0.0                 | 5.1                |
| 15  | <i>Eurotiales</i> (A)        | <i>Thysanophora penicillioides</i> (JF340235) | 99         | 0.0     | 14.3                   | 0.0 <sup>a</sup>   | 69.9 <sup>b</sup>  | 0.0 <sup>a</sup>  | 1.0 <sup>a</sup>    | 0.4 <sup>a</sup>   |
| 4   | <i>Coniochaetales</i> (A)    | <i>Lecythophora hoffmannii</i> (JN942898)     | 95         | 3e-84   | 12.8                   | 1.2                | 5.9                | 7.7               | 13.1                | 12.5               |
| 361 | <i>Leotiomycetes</i> (A)     | <i>Geomyces pannorum</i> (DQ189228)           | 100        | 0.0     | 11.9                   | 0.0                | 0.0                | 32.6              | 37.6                | 0.0                |
| 1   | <i>Agaricales</i> (B)        | <i>Nolanea conferenda</i> (AF538624)          | 100        | 0.0     | 9.2                    | 1.7                | 6.9                | 7.4               | 0.9                 | 31.8               |
| 682 | <i>Helotiales</i> (A)        | <i>Meliniomyces vraolstadiae</i> (HQ157883)   | 98         | 0.0     | 9.1                    | 21.6 <sup>b</sup>  | 14.3 <sup>ab</sup> | 0.4 <sup>ab</sup> | 1.9 <sup>ab</sup>   | 3.2 <sup>a</sup>   |
| 14  | <i>Helotiales</i> (A)        | <i>Phialocephala virens</i> (AF486132)        | 96         | e-174   | 8.5                    | 2.4                | 4.9                | 23.5              | 7.5                 | 3.3                |
| 297 | <i>Atheliales</i> (B)        | <i>Tylospora fibrillosa</i> (DQ068974)        | 99         | 0.0     | 8.4                    | 31.2               | 10.8               | 0.0               | 0.0                 | 0.0                |
| 22  | <i>Agaricales</i> (B)        | <i>Lyophyllum connatum</i> (UDB011836)        | 99         | 1e-86   | 8.3                    | 1.6                | 20.4               | 8.7               | 10.5                | 2.9                |

|      |                            |                                                |     |       |     |                   |                   |                   |                   |                   |
|------|----------------------------|------------------------------------------------|-----|-------|-----|-------------------|-------------------|-------------------|-------------------|-------------------|
| 2    | <i>Mortierellales</i> (M)  | <i>Mortierella macrocystis</i> (AJ878782)      | 98  | 0.0   | 8.0 | 2.7               | 6.3               | 5.9               | 8.5               | 9.3               |
| 256  | <i>Helotiales</i> (A)      | <i>Cadophora finlandica</i> (EF093179)         | 93  | e-119 | 7.7 | 3.4               | 6.1               | 27.2              | 2.8               | 7.3               |
| 52   | <i>Helotiales</i> (A)      | <i>Leptodontidium elatius</i> (JF340290)       | 96  | 0.0   | 6.9 | 0.0 <sup>a</sup>  | 0.0 <sup>a</sup>  | 7.8 <sup>ab</sup> | 18.9 <sup>b</sup> | 7.4 <sup>ab</sup> |
| 26   | <i>Mortierellales</i> (M)  | <i>Mortierella gemmifera</i> (HQ630293)        | 100 | 0.0   | 6.8 | 9.6               | 9.0               | 2.5               | 7.5               | 4.9               |
| 156  | <i>Leotiomycetes</i> (A)   | <i>Pseudeurotium bakeri</i> (GU934582)         | 95  | e-178 | 6.6 | 8.1               | 6.8               | 0.8               | 14.1              | 3.5               |
| 36   | <i>Helotiales</i> (A)      | <i>Meliniomyces variabilis</i> (EF093164)      | 97  | 0.0   | 6.2 | 2.9               | 3.8               | 1.6               | 11.3              | 10.8              |
| 165  | <i>Leotiomycetes</i> (A)   | <i>Collophora pallida</i> (GQ154575)           | 90  | e-127 | 5.3 | 2.8               | 5.2               | 3.7               | 2.8               | 6.3               |
| 31   | <i>Helotiales</i> (A)      | <i>Hyaloscypha daedaleae</i> (AY789416)        | 98  | 0.0   | 5.0 | 1.0               | 1.2               | 5.3               | 5.6               | 8.8               |
| 147  | <i>Helotiales</i> (A)      | <i>Cadophora finlandica</i> (EF093179)         | 94  | e-119 | 4.6 | 0.4               | 0.0               | 0.0               | 5.6               | 10.8              |
| 38   | <i>Helotiales</i> (A)      | <i>Meliniomyces bicolor</i> (HQ157880)         | 96  | 0.0   | 4.5 | 2.4               | 12.1              | 2.5               | 3.7               | 2.1               |
| 102  | (A)                        | <i>Spirosphaera carici graminis</i> (EF029232) | 88  | e-124 | 4.2 | 0.5               | 0.0               | 17.3              | 5.6               | 0.8               |
| 123  | <i>Mortierellales</i> (M)  | <i>Mortierella pulchella</i> (HQ630351)        | 99  | 0.0   | 4.0 | 0.5 <sup>a</sup>  | 11.7 <sup>b</sup> | 7.4 <sup>a</sup>  | 1.9 <sup>a</sup>  | 1.1 <sup>a</sup>  |
| 523  | <i>Mortierellales</i> (M)  | <i>Mortierella verticillata</i> (JN943796)     | 98  | 0.0   | 4.0 | 14.6              | 5.4               | 0.0               | 0.0               | 0.0               |
| 41   | <i>Verrucariales</i> (A)   | <i>Verrucaria funckii</i> (EU249488)           | 86  | e-111 | 3.9 | 4.3 <sup>ab</sup> | 9.5 <sup>b</sup>  | 0.0 <sup>a</sup>  | 0.9 <sup>ab</sup> | 4.0 <sup>ab</sup> |
| 44   | <i>Mortierellales</i> (M)  | <i>Mortierella gamsii</i> (AJ878508)           | 92  | e-149 | 3.5 | 0.2               | 1.5               | 0.0               | 5.6               | 10.0              |
| 51   | <i>Helotiales</i> (A)      | <i>Mollisia cinerea</i> (AY259135)             | 96  | e-154 | 3.4 | 0.0 <sup>a</sup>  | 1.5 <sup>ab</sup> | 12.4 <sup>b</sup> | 0.0 <sup>a</sup>  | 2.5 <sup>ab</sup> |
| 590  | <i>Helotiales</i> (A)      | <i>Helgardia aestiva</i> (AY266145)            | 98  | 0.0   | 3.3 | 1.9               | 0.0               | 17.3              | 0.0               | 0.9               |
| 76   | <i>Mortierellales</i> (M)  | <i>Mortierella macrocystis</i> (AJ878782)      | 97  | 0.0   | 3.3 | 0.0 <sup>a</sup>  | 0.0 <sup>a</sup>  | 5.0 <sup>ab</sup> | 0.0 <sup>a</sup>  | 8.1 <sup>b</sup>  |
| 108  | <i>Helotiales</i> (A)      | <i>Phialocephala virens</i> (AF486132)         | 95  | e-167 | 3.2 | 0.5               | 0.4               | 0.4               | 0.9               | 9.1               |
| 2921 | <i>Helotiales</i> (A)      | <i>Ascocoryne cylichnium</i> (AY789395)        | 91  | e-146 | 3.2 | 0.0               | 0.0               | 9.9               | 3.7               | 1.4               |
| 68   | <i>Leotiomycetes</i> (A)   | <i>Oidiodendron echinulatum</i> (DQ069040)     | 98  | 0.0   | 2.9 | 0.0               | 5.4               | 0.0               | 4.7               | 4.3               |
| 56   | <i>Helotiales</i> (A)      | <i>Chalara longipes</i> (FR667214)             | 99  | 0.0   | 2.5 | 0.5 <sup>a</sup>  | 11.9 <sup>b</sup> | 0.0 <sup>a</sup>  | 0.0 <sup>a</sup>  | 0.0 <sup>a</sup>  |
| 404  | <i>Helotiales</i> (A)      | <i>Phialocephala fortinii</i> (HM595526)       | 98  | 0.0   | 2.2 | 0.0               | 0.4               | 0.0               | 4.7               | 0.6               |
| 301  | <i>Venturiales</i> (A)     | <i>Venturia fraxini</i> (EU035457)             | 89  | e-139 | 2.1 | 4.7 <sup>b</sup>  | 5.7 <sup>b</sup>  | 0.0 <sup>a</sup>  | 0.0 <sup>a</sup>  | 0.0 <sup>a</sup>  |
| 134  | <i>Helotiales</i> (A)      | <i>Allantophomopsis lycopodina</i> (AB041243)  | 98  | 0.0   | 2.0 | 7.2 <sup>b</sup>  | 3.0 <sup>ab</sup> | 0.0 <sup>a</sup>  | 0.0 <sup>a</sup>  | 0.0 <sup>a</sup>  |
| 151  | <i>Agaricales</i> (B)      | <i>Mycena galopus</i> (JF908484)               | 92  | 7e-89 | 2.0 | 0.4               | 1.5               | 0.0               | 7.6               | 0.2               |
| 269  | <i>Septobasidiales</i> (B) | <i>Auriculoscypha anacardiicola</i> (DQ419922) | 86  | 4e-87 | 1.4 | 3.0               | 3.9               | 0.0               | 0.0               | 0.0               |
